# Supplementary material for: Spray-Drying Performance and Thermal Stability of L-ascorbic Acid Microencapsulated with Sodium Alginate and Gum Arabic
Source: PubMed Central journal article supplement (PMC6721127; doi:10.3390/molecules24162872), 2019-08-07
Supplement: molecules-24-02872-s001.pdf [file molecules-24-02872-s001.pdf]

# Spray-Drying Performance and Thermal Stability of L-Ascorbic Acid Microencapsulated with Sodium Alginate and Gum Arabic

Pabla A. Barra <sup>1</sup>, Katherine Márquez <sup>1</sup>, Oscar Gil-Castell <sup>2,3</sup>, Javiera Mujica <sup>4</sup>, Amparo Ribes-Greus <sup>3</sup> and Mirko Faccini <sup>1,5,\*</sup>

<sup>1</sup> R&D Department, Leitat Chile, Calle Román Díaz 532, Providencia, Santiago 7500724, Chile

<sup>2</sup> Instituto de Tecnología de Materiales (ITM), Universitat Politècnica de València (UPV), Camino de Vera s/n, 46022 Valencia, Spain

<sup>3</sup> Departament d'Enginyeria Química, Escola Tècnica Superior d'Enginyeria, Universitat de València, Av. de la Universitat, s/n, 46100 Burjassot, Spain

<sup>4</sup> Centro de Excelencia en Nanotecnología (CEN) Chile, Calle Román Díaz 532, Providencia, Santiago 7500724, Chile

<sup>5</sup> Materials Chemistry Division, Leitat Technological Center, C/Pallars 179–185, 08005 Barcelona, Spain

\* Correspondence: mfaccini@leitat.org

**Table 1.** ANOVA analysis for the response variables: Encapsulation efficiency (%), mean particle size ( $\mu\text{m}$ ) and encapsulation yield (%) involved in the AA encapsulation using Alginic acid and arabic gum as wall polymers.

|              | Factor                                                   | DOF (f) | Sum of squares | F-ratio (F) | p-Value  |
|--------------|----------------------------------------------------------|---------|----------------|-------------|----------|
| AA:ALG-based | <b>i) Encapsulation Efficiency (%)</b>                   |         |                |             |          |
|              | AA:ALG ratio                                             | 2       | 127.46         | 10.94       | 0.002    |
|              | Dispersed solids (g/L)                                   | 2       | 29.63          | 2.54        | 0.117    |
|              | Error                                                    | 13      | 75.72          |             |          |
|              | Total                                                    | 17      | 232.81         |             |          |
|              | <b>ii) Mean particle size (<math>\mu\text{m}</math>)</b> |         |                |             |          |
|              | AA:ALG ratio                                             | 2       | 19.1           | 1.83        | 0.199    |
|              | Dispersed solids (g/L)                                   | 2       | 34.3           | 3.29        | 0.070    |
|              | Error                                                    | 13      | 67.71          |             |          |
|              | Total                                                    | 17      | 121.11         |             |          |
|              | <b>iii) Encapsulation Yield (%)</b>                      |         |                |             |          |
|              | AA:ALG Ratio                                             | 2       | 69.6           | 3.99        | 0.044    |
|              | Dispersed solids (g/L)                                   | 2       | 3508.6         | 201.52      | 1.64E-10 |
| Error        | 13                                                       | 113.17  |                |             |          |
| Total        | 17                                                       | 3691.37 |                |             |          |
| AA:GA-based  | <b>i) Encapsulation Efficiency (%)</b>                   |         |                |             |          |
|              | AA:GA ratio                                              | 2       | 30.77          | 0.73        | 0.500    |
|              | Dispersed solids (g/L)                                   | 2       | 280.32         | 6.56        | 0.010    |
|              | Error                                                    | 13      | 273.69         |             |          |
|              | Total                                                    | 17      | 584.78         |             |          |
|              | <b>ii) Mean particle size (<math>\mu\text{m}</math>)</b> |         |                |             |          |
|              | AA:GA ratio                                              | 2       | 84.14          | 34.27       | 6.55E-06 |
|              | Dispersed solids (g/L)                                   | 2       | 12.12          | 4.94        | 0.025    |
|              | Error                                                    | 13      | 15.96          |             |          |
|              | Total                                                    | 17      | 112.22         |             |          |

| <b>iii) Encapsulation Yield (%)</b> |    |         |       |          |
|-------------------------------------|----|---------|-------|----------|
| AA:GA ratio                         | 2  | 894.8   | 24.28 | 4.10E-05 |
| Dispersed solids (g/L)              | 2  | 14.9    | 0.40  | 0.68     |
| Error                               | 13 | 239.55  |       |          |
| Total                               | 17 | 1149.22 |       |          |

**Table 2.** Water Activity for the AA microparticles obtained using ALG and GA as wall polymers.

|                     | <b>AA:ALG</b> | <b>Water Activity (<math>a_w</math>)</b> | <b>T (°C)</b> |
|---------------------|---------------|------------------------------------------|---------------|
| <b>AA:ALG-based</b> | AA:ALG-5      | 0.27 ± 0.01                              | 24.8          |
|                     | AA:ALG-12.5   | 0.38 ± 0.06                              | 25.0          |
|                     | AA:ALG-20     | 0.34 ± 0.01                              | 24.9          |
|                     | AA:2ALG-5     | 0.35 ± 0.01                              | 24.9          |
|                     | AA:2ALG-12.5  | 0.35 ± 0.02                              | 24.8          |
|                     | AA:2ALG-20    | 0.36 ± 0.02                              | 24.8          |
|                     | AA:4ALG-5     | 0.35 ± 0.01                              | 25.1          |
|                     | AA:4ALG-12.5  | 0.32 ± 0.01                              | 25.1          |
|                     | AA:4ALG-20    | 0.37 ± 0.01                              | 25.7          |
| <b>AA:GA-based</b>  | AA:ALG-5      | 0.30 ± 0.01                              | 25.9          |
|                     | AA:GA-5       | 0.39 ± 0.03                              | 25.0          |
|                     | AA:GA-12.5    | 0.26 ± 0.01                              | 24.9          |
|                     | AA:GA-20      | 0.23 ± 0.02                              | 24.6          |
|                     | AA:2GA-5      | 0.23 ± 0.01                              | 24.6          |
|                     | AA:2GA-12.5   | 0.32 ± 0.01                              | 24.9          |
|                     | AA:2GA-20     | 0.20 ± 0.01                              | 24.6          |
|                     | AA:4GA-5      | 0.21 ± 0.02                              | 24.7          |
|                     | AA:4GA-12.5   | 0.23 ± 0.01                              | 24.9          |
| AA:4GA-20           | 0.23 ± 0.01   | 24.9                                     |               |
